# Supplementary material
Source: publisher figshare collection journal article supplement (https://acs.figshare.com/ndownloader/files/3859720)
Supplement: Supplementary file 1 [file 3859720]

 
data_cu_zyh_zh16522_0m 
 
_audit_creation_method            SHELXL-97 
_chemical_name_systematic 
; 
 ? 
; 
_chemical_name_common             ? 
_chemical_melting_point           ? 
_chemical_formula_moiety          '2(C33 H40 O5), C3 H6 O' 
_chemical_formula_sum 
 'C69 H86 O11' 
_chemical_formula_weight          1091.38 
_chemical_absolute_configuration  ad 
 
loop_ 
 _atom_type_symbol 
 _atom_type_description 
 _atom_type_scat_dispersion_real 
 _atom_type_scat_dispersion_imag 
 _atom_type_scat_source 
 'C'  'C'   0.0181   0.0091 
 'International Tables Vol C Tables 4.2.6.8 and 6.1.1.4' 
 'H'  'H'   0.0000   0.0000 
 'International Tables Vol C Tables 4.2.6.8 and 6.1.1.4' 
 'O'  'O'   0.0492   0.0322 
 'International Tables Vol C Tables 4.2.6.8 and 6.1.1.4' 
 
_symmetry_cell_setting           'Orthorhombic'
_symmetry_space_group_name_H-M   'P 21 21 21'
_symmetry_space_group_name_Hall  'P 2ac 2ab'
 
loop_ 
 _symmetry_equiv_pos_as_xyz 
 'x, y, z' 
 'x+1/2, -y+1/2, -z' 
 '-x, y+1/2, -z+1/2' 
 '-x+1/2, -y, z+1/2' 
 
_cell_length_a                    11.7131(4) 
_cell_length_b                    13.2133(4) 
_cell_length_c                    38.0111(12) 
_cell_angle_alpha                 90.00 
_cell_angle_beta                  90.00 
_cell_angle_gamma                 90.00 
_cell_volume                      5882.9(3) 
_cell_formula_units_Z             4 
_cell_measurement_temperature     100(2) 
_cell_measurement_reflns_used     9863
_cell_measurement_theta_min       4.07
_cell_measurement_theta_max       68.80

_exptl_crystal_description       'prism'
_exptl_crystal_colour            'colourless' 
_exptl_crystal_size_max           0.66 
_exptl_crystal_size_mid           0.33 
_exptl_crystal_size_min           0.22 
_exptl_crystal_density_meas       ? 
_exptl_crystal_density_diffrn     1.232 
_exptl_crystal_density_method     'not measured' 
_exptl_crystal_F_000              2352 
_exptl_absorpt_coefficient_mu     0.653 
_exptl_absorpt_correction_type    'multi-scan' 
_exptl_absorpt_correction_T_min   0.6725 
_exptl_absorpt_correction_T_max   0.8697 
_exptl_absorpt_process_details    'sadabs' 
 
_exptl_special_details 
; 
 ? 
; 
 
_diffrn_ambient_temperature       100(2) 
_diffrn_radiation_wavelength      1.54178 
_diffrn_radiation_type            CuK\a 
_diffrn_radiation_source          'fine-focus sealed tube' 
_diffrn_radiation_monochromator   graphite 
_diffrn_measurement_device_type  'Bruker APEX-II CCD'
_diffrn_measurement_method       '\f and \w scans' 
_diffrn_detector_area_resol_mean  ? 
_diffrn_reflns_number             46623 
_diffrn_reflns_av_R_equivalents   0.0819 
_diffrn_reflns_av_sigmaI/netI     0.0627 
_diffrn_reflns_limit_h_min        -13 
_diffrn_reflns_limit_h_max        13 
_diffrn_reflns_limit_k_min        -15 
_diffrn_reflns_limit_k_max        15 
_diffrn_reflns_limit_l_min        -46 
_diffrn_reflns_limit_l_max        46 
_diffrn_reflns_theta_min          3.95 
_diffrn_reflns_theta_max          72.34 
_reflns_number_total              10370 
_reflns_number_gt                 9655 
_reflns_threshold_expression      >2sigma(I) 
 
_computing_data_collection      'Bruker APEX2'
_computing_cell_refinement      'Bruker SAINT'
_computing_data_reduction       'Bruker SAINT' 
_computing_structure_solution   'SHELXS-97 (Sheldrick, 2008)'
_computing_structure_refinement 'SHELXL-97 (Sheldrick, 2008)'
_computing_molecular_graphics   'Bruker SHELXTL'
_computing_publication_material 'Bruker SHELXTL'
 
_refine_special_details 
; 
 Refinement of F^2^ against ALL reflections.  The weighted R-factor wR and 
 goodness of fit S are based on F^2^, conventional R-factors R are based 
 on F, with F set to zero for negative F^2^. The threshold expression of 
 F^2^ > 2sigma(F^2^) is used only for calculating R-factors(gt) etc. and is 
 not relevant to the choice of reflections for refinement.  R-factors based 
 on F^2^ are statistically about twice as large as those based on F, and R- 
 factors based on ALL data will be even larger. 
; 
 
_refine_ls_structure_factor_coef  Fsqd  
_refine_ls_matrix_type            full 
_refine_ls_weighting_scheme       calc  
_refine_ls_weighting_details 
 'calc w=1/[\s^2^(Fo^2^)+(0.0848P)^2^+9.0446P] where P=(Fo^2^+2Fc^2^)/3' 
_atom_sites_solution_primary      direct 
_atom_sites_solution_secondary    difmap 
_atom_sites_solution_hydrogens    geom 
_refine_ls_hydrogen_treatment     constr 
_refine_ls_extinction_method      SHELXL 
_refine_ls_extinction_coef        0.00185(17) 
_refine_ls_extinction_expression 
 'Fc^*^=kFc[1+0.001xFc^2^\l^3^/sin(2\q)]^-1/4^' 
_refine_ls_abs_structure_details 
 'Flack H D (1983), Acta Cryst. A39, 876-881' 
_refine_ls_abs_structure_Flack    0.4(2) 
_refine_ls_number_reflns          10370 
_refine_ls_number_parameters      740 
_refine_ls_number_restraints      0 
_refine_ls_R_factor_all           0.0774 
_refine_ls_R_factor_gt            0.0587 
_refine_ls_wR_factor_ref          0.2009 
_refine_ls_wR_factor_gt           0.1513 
_refine_ls_goodness_of_fit_ref    1.157 
_refine_ls_restrained_S_all       1.157 
_refine_ls_shift/su_max           0.000 
_refine_ls_shift/su_mean          0.000 
 
loop_ 
 _atom_site_label 
 _atom_site_type_symbol 
 _atom_site_fract_x 
 _atom_site_fract_y 
 _atom_site_fract_z 
 _atom_site_U_iso_or_equiv 
 _atom_site_adp_type 
 _atom_site_occupancy 
 _atom_site_symmetry_multiplicity 
 _atom_site_calc_flag 
 _atom_site_refinement_flags 
 _atom_site_disorder_assembly 
 _atom_site_disorder_group 
O14 O 0.1910(2) 0.5011(2) 0.13580(7) 0.0284(6) Uani 1 1 d . . . 
O7 O 0.5700(3) 0.67330(19) 0.13281(7) 0.0256(6) Uani 1 1 d . . . 
H7 H 0.6321 0.6453 0.1381 0.038 Uiso 1 1 calc R . . 
O2 O 0.4219(2) 0.27511(19) 0.16797(7) 0.0262(6) Uani 1 1 d . . . 
O15 O 0.4390(3) 0.2791(2) 0.25859(7) 0.0300(6) Uani 1 1 d . . . 
O12 O 0.2159(2) 0.4585(2) 0.24401(7) 0.0273(6) Uani 1 1 d . . . 
O7' O 0.4814(3) -0.1483(2) 0.16274(7) 0.0266(6) Uani 1 1 d . . . 
H7' H 0.5122 -0.2042 0.1583 0.040 Uiso 1 1 calc R . . 
O2' O 0.6079(2) 0.22783(18) 0.10628(7) 0.0243(6) Uani 1 1 d . . . 
O15' O 0.9070(3) 0.2239(2) 0.12483(7) 0.0281(6) Uani 1 1 d . . . 
O12' O 0.8775(2) 0.04862(19) 0.05636(7) 0.0244(6) Uani 1 1 d . . . 
O14' O 0.5428(2) -0.0248(2) 0.03895(7) 0.0256(6) Uani 1 1 d . . . 
O1S O 0.7686(3) 0.5857(3) 0.15802(9) 0.0460(9) Uani 1 1 d . . . 
C24 C 0.4600(4) 0.3762(3) 0.02894(12) 0.0332(10) Uani 1 1 d . . . 
H24A H 0.5216 0.4199 0.0204 0.050 Uiso 1 1 calc R . . 
H24B H 0.4261 0.3396 0.0091 0.050 Uiso 1 1 calc R . . 
H24C H 0.4909 0.3276 0.0459 0.050 Uiso 1 1 calc R . . 
C22 C 0.3712(4) 0.4391(3) 0.04623(10) 0.0277(9) Uani 1 1 d . . . 
C5 C 0.3910(3) 0.4850(3) 0.08243(10) 0.0227(8) Uani 1 1 d . . . 
H5 H 0.3236 0.5297 0.0869 0.027 Uiso 1 1 calc R . . 
C4 C 0.3838(4) 0.4006(3) 0.11011(10) 0.0234(8) Uani 1 1 d . . . 
H4A H 0.3134 0.3606 0.1062 0.028 Uiso 1 1 calc R . . 
H4B H 0.4499 0.3546 0.1074 0.028 Uiso 1 1 calc R . . 
C3 C 0.3827(3) 0.4433(3) 0.14752(10) 0.0199(7) Uani 1 1 d . . . 
C2 C 0.3945(3) 0.3603(3) 0.17500(11) 0.0234(8) Uani 1 1 d . . . 
C1 C 0.3808(3) 0.3964(3) 0.21323(10) 0.0224(8) Uani 1 1 d . . . 
C15 C 0.3656(4) 0.3026(3) 0.23690(10) 0.0243(8) Uani 1 1 d . . . 
C16 C 0.2595(3) 0.2414(3) 0.23278(9) 0.0205(7) Uani 1 1 d . . . 
C17 C 0.1871(3) 0.2471(3) 0.20352(10) 0.0245(8) Uani 1 1 d . . . 
H17 H 0.2036 0.2937 0.1852 0.029 Uiso 1 1 calc R . . 
C18 C 0.0919(4) 0.1856(3) 0.20107(11) 0.0279(9) Uani 1 1 d . . . 
H18 H 0.0434 0.1902 0.1811 0.033 Uiso 1 1 calc R . . 
C19 C 0.0674(4) 0.1177(3) 0.22754(11) 0.0275(9) Uani 1 1 d . . . 
H19 H 0.0034 0.0739 0.2256 0.033 Uiso 1 1 calc R . . 
C31 C 0.0399(4) 0.8193(4) 0.19707(14) 0.0411(11) Uani 1 1 d . . . 
H31A H 0.0480 0.7763 0.1762 0.062 Uiso 1 1 calc R . . 
H31B H 0.0687 0.8872 0.1918 0.062 Uiso 1 1 calc R . . 
H31C H -0.0409 0.8234 0.2037 0.062 Uiso 1 1 calc R . . 
C29 C 0.1065(4) 0.7748(3) 0.22679(12) 0.0291(9) Uani 1 1 d . . . 
C28 C 0.1559(3) 0.6840(3) 0.22629(11) 0.0263(8) Uani 1 1 d . . . 
H28 H 0.1952 0.6635 0.2470 0.032 Uiso 1 1 calc R . . 
C27 C 0.1549(4) 0.6111(3) 0.19610(11) 0.0262(8) Uani 1 1 d . . . 
H27A H 0.1397 0.6491 0.1741 0.031 Uiso 1 1 calc R . . 
H27B H 0.0915 0.5626 0.1995 0.031 Uiso 1 1 calc R . . 
C11 C 0.2665(4) 0.5517(3) 0.19173(10) 0.0243(8) Uani 1 1 d . . . 
C14 C 0.2718(3) 0.5004(3) 0.15593(11) 0.0232(8) Uani 1 1 d . . . 
C8 C 0.4875(3) 0.5144(3) 0.15413(10) 0.0213(8) Uani 1 1 d . . . 
H8 H 0.5588 0.4735 0.1514 0.026 Uiso 1 1 calc R . . 
C7 C 0.4872(3) 0.5983(3) 0.12539(10) 0.0228(8) Uani 1 1 d . . . 
H7A H 0.4110 0.6323 0.1266 0.027 Uiso 1 1 calc R . . 
C6 C 0.4989(3) 0.5544(3) 0.08772(10) 0.0222(8) Uani 1 1 d . . . 
C26 C 0.4898(4) 0.6420(3) 0.06125(10) 0.0295(9) Uani 1 1 d . . . 
H26A H 0.4884 0.6148 0.0373 0.044 Uiso 1 1 calc R . . 
H26B H 0.5557 0.6870 0.0640 0.044 Uiso 1 1 calc R . . 
H26C H 0.4194 0.6801 0.0656 0.044 Uiso 1 1 calc R . . 
C23 C 0.2669(4) 0.4508(3) 0.03190(11) 0.0335(9) Uani 1 1 d . . . 
H23A H 0.2489 0.4184 0.0103 0.040 Uiso 1 1 calc R . . 
H23B H 0.2114 0.4914 0.0434 0.040 Uiso 1 1 calc R . . 
C25 C 0.6135(4) 0.5017(3) 0.08250(11) 0.0280(9) Uani 1 1 d . . . 
H25A H 0.6751 0.5460 0.0907 0.042 Uiso 1 1 calc R . . 
H25B H 0.6245 0.4868 0.0575 0.042 Uiso 1 1 calc R . . 
H25C H 0.6147 0.4385 0.0960 0.042 Uiso 1 1 calc R . . 
C9 C 0.4827(3) 0.5540(3) 0.19198(10) 0.0211(8) Uani 1 1 d . . . 
H9 H 0.5499 0.5995 0.1955 0.025 Uiso 1 1 calc R . . 
C10 C 0.3747(3) 0.6176(3) 0.19696(10) 0.0220(8) Uani 1 1 d . . . 
H10A H 0.3744 0.6739 0.1798 0.026 Uiso 1 1 calc R . . 
H10B H 0.3743 0.6471 0.2209 0.026 Uiso 1 1 calc R . . 
C13 C 0.4915(3) 0.4663(3) 0.21962(10) 0.0241(8) Uani 1 1 d . . . 
C21 C 0.2334(4) 0.1741(3) 0.25945(11) 0.0267(8) Uani 1 1 d . . . 
H21 H 0.2818 0.1692 0.2794 0.032 Uiso 1 1 calc R . . 
C20 C 0.1367(4) 0.1138(3) 0.25705(11) 0.0267(8) Uani 1 1 d . . . 
H20 H 0.1178 0.0694 0.2758 0.032 Uiso 1 1 calc R . . 
C12 C 0.2786(3) 0.4666(3) 0.21815(9) 0.0211(8) Uani 1 1 d . . . 
C32 C 0.6025(4) 0.4068(3) 0.21486(11) 0.0273(8) Uani 1 1 d . . . 
H32A H 0.6138 0.3618 0.2351 0.041 Uiso 1 1 calc R . . 
H32B H 0.6668 0.4540 0.2132 0.041 Uiso 1 1 calc R . . 
H32C H 0.5981 0.3664 0.1933 0.041 Uiso 1 1 calc R . . 
C33 C 0.4911(4) 0.5097(3) 0.25703(10) 0.0267(8) Uani 1 1 d . . . 
H33A H 0.5551 0.5569 0.2597 0.040 Uiso 1 1 calc R . . 
H33B H 0.4989 0.4545 0.2741 0.040 Uiso 1 1 calc R . . 
H33C H 0.4191 0.5456 0.2612 0.040 Uiso 1 1 calc R . . 
C30 C 0.1106(4) 0.8392(3) 0.25911(13) 0.0361(10) Uani 1 1 d . . . 
H30A H 0.1513 0.9023 0.2539 0.054 Uiso 1 1 calc R . . 
H30B H 0.1505 0.8027 0.2779 0.054 Uiso 1 1 calc R . . 
H30C H 0.0326 0.8549 0.2667 0.054 Uiso 1 1 calc R . . 
C24' C 0.1854(4) 0.1479(3) 0.09560(14) 0.0370(10) Uani 1 1 d . . . 
H24D H 0.1043 0.1570 0.0901 0.056 Uiso 1 1 calc R . . 
H24E H 0.2298 0.2020 0.0845 0.056 Uiso 1 1 calc R . . 
H24F H 0.1964 0.1504 0.1211 0.056 Uiso 1 1 calc R . . 
C22' C 0.2245(4) 0.0482(3) 0.08205(11) 0.0283(9) Uani 1 1 d . . . 
C5' C 0.3416(3) 0.0077(3) 0.09172(10) 0.0225(8) Uani 1 1 d . . . 
H5' H 0.3629 -0.0411 0.0727 0.027 Uiso 1 1 calc R . . 
C4' C 0.4318(3) 0.0927(3) 0.09058(10) 0.0221(8) Uani 1 1 d . . . 
H4'1 H 0.4277 0.1271 0.0675 0.026 Uiso 1 1 calc R . . 
H4'2 H 0.4136 0.1434 0.1089 0.026 Uiso 1 1 calc R . . 
C3' C 0.5526(3) 0.0546(3) 0.09627(9) 0.0188(7) Uani 1 1 d . . . 
C2' C 0.6378(4) 0.1413(3) 0.10133(9) 0.0208(8) Uani 1 1 d . . . 
C1' C 0.7627(3) 0.1094(3) 0.10398(10) 0.0214(8) Uani 1 1 d . . . 
C15' C 0.8411(3) 0.2022(3) 0.10076(10) 0.0218(8) Uani 1 1 d . . . 
C16' C 0.8426(3) 0.2645(3) 0.06806(10) 0.0219(8) Uani 1 1 d . . . 
C21' C 0.9320(4) 0.3312(3) 0.06338(11) 0.0269(8) Uani 1 1 d . . . 
H21' H 0.9900 0.3355 0.0808 0.032 Uiso 1 1 calc R . . 
C20' C 0.9388(4) 0.3922(3) 0.03374(11) 0.0296(9) Uani 1 1 d . . . 
H20' H 1.0013 0.4373 0.0309 0.036 Uiso 1 1 calc R . . 
C19' C 0.8540(4) 0.3872(3) 0.00836(10) 0.0305(9) Uani 1 1 d . . . 
H19' H 0.8574 0.4297 -0.0118 0.037 Uiso 1 1 calc R . . 
C31' C 0.8268(5) -0.3259(4) 0.00826(15) 0.0496(14) Uani 1 1 d . . . 
H31D H 0.7554 -0.2904 0.0029 0.074 Uiso 1 1 calc R . . 
H31E H 0.8098 -0.3884 0.0211 0.074 Uiso 1 1 calc R . . 
H31F H 0.8663 -0.3426 -0.0137 0.074 Uiso 1 1 calc R . . 
C29' C 0.9009(4) -0.2600(3) 0.03014(11) 0.0278(9) Uani 1 1 d . . . 
C28' C 0.8666(4) -0.1735(3) 0.04471(10) 0.0265(8) Uani 1 1 d . . . 
H28' H 0.9203 -0.1388 0.0590 0.032 Uiso 1 1 calc R . . 
C27' C 0.7511(4) -0.1259(3) 0.04068(11) 0.0271(9) Uani 1 1 d . . . 
H27C H 0.6933 -0.1801 0.0384 0.032 Uiso 1 1 calc R . . 
H27D H 0.7501 -0.0859 0.0186 0.032 Uiso 1 1 calc R . . 
C11' C 0.7174(3) -0.0571(3) 0.07110(10) 0.0215(8) Uani 1 1 d . . . 
C10' C 0.7174(3) -0.1134(3) 0.10717(11) 0.0230(8) Uani 1 1 d . . . 
H10C H 0.6631 -0.1708 0.1062 0.028 Uiso 1 1 calc R . . 
H10D H 0.7945 -0.1411 0.1118 0.028 Uiso 1 1 calc R . . 
C9' C 0.6837(3) -0.0424(3) 0.13681(9) 0.0218(8) Uani 1 1 d . . . 
H9' H 0.6864 -0.0817 0.1593 0.026 Uiso 1 1 calc R . . 
C8' C 0.5607(3) -0.0070(3) 0.13128(10) 0.0208(8) Uani 1 1 d . . . 
H8' H 0.5416 0.0402 0.1510 0.025 Uiso 1 1 calc R . . 
C7' C 0.4707(3) -0.0914(3) 0.13126(10) 0.0224(8) Uani 1 1 d . . . 
H7'1 H 0.4877 -0.1376 0.1111 0.027 Uiso 1 1 calc R . . 
C6' C 0.3467(4) -0.0530(3) 0.12704(11) 0.0257(8) Uani 1 1 d . . . 
C25' C 0.3094(4) 0.0091(3) 0.15912(11) 0.0284(9) Uani 1 1 d . . . 
H25D H 0.3227 -0.0302 0.1806 0.043 Uiso 1 1 calc R . . 
H25E H 0.2279 0.0252 0.1572 0.043 Uiso 1 1 calc R . . 
H25F H 0.3536 0.0720 0.1601 0.043 Uiso 1 1 calc R . . 
C23' C 0.1574(4) -0.0055(4) 0.05941(13) 0.0375(10) Uani 1 1 d . . . 
H23C H 0.0856 0.0209 0.0523 0.045 Uiso 1 1 calc R . . 
H23D H 0.1825 -0.0692 0.0508 0.045 Uiso 1 1 calc R . . 
C13' C 0.7700(4) 0.0474(3) 0.14016(10) 0.0236(8) Uani 1 1 d . . . 
C32' C 0.7410(4) 0.1140(3) 0.17201(10) 0.0280(9) Uani 1 1 d . . . 
H32D H 0.7988 0.1672 0.1744 0.042 Uiso 1 1 calc R . . 
H32E H 0.7399 0.0724 0.1933 0.042 Uiso 1 1 calc R . . 
H32F H 0.6658 0.1450 0.1686 0.042 Uiso 1 1 calc R . . 
C33' C 0.8908(4) 0.0060(3) 0.14550(11) 0.0284(9) Uani 1 1 d . . . 
H33D H 0.8908 -0.0423 0.1651 0.043 Uiso 1 1 calc R . . 
H33E H 0.9429 0.0619 0.1508 0.043 Uiso 1 1 calc R . . 
H33F H 0.9160 -0.0283 0.1240 0.043 Uiso 1 1 calc R . . 
C17' C 0.7589(3) 0.2580(3) 0.04127(10) 0.0247(8) Uani 1 1 d . . . 
H17' H 0.6985 0.2104 0.0433 0.030 Uiso 1 1 calc R . . 
C18' C 0.7645(4) 0.3198(3) 0.01243(11) 0.0276(8) Uani 1 1 d . . . 
H18' H 0.7063 0.3165 -0.0050 0.033 Uiso 1 1 calc R . . 
C12' C 0.7932(3) 0.0354(3) 0.07471(9) 0.0200(8) Uani 1 1 d . . . 
C14' C 0.5980(3) -0.0116(3) 0.06595(10) 0.0210(8) Uani 1 1 d . . . 
C26' C 0.2685(4) -0.1458(3) 0.12420(12) 0.0304(9) Uani 1 1 d . . . 
H26D H 0.1889 -0.1236 0.1223 0.046 Uiso 1 1 calc R . . 
H26E H 0.2775 -0.1881 0.1452 0.046 Uiso 1 1 calc R . . 
H26F H 0.2891 -0.1851 0.1033 0.046 Uiso 1 1 calc R . . 
C30' C 1.0210(4) -0.2967(3) 0.03447(13) 0.0370(10) Uani 1 1 d . . . 
H30D H 1.0645 -0.2475 0.0484 0.056 Uiso 1 1 calc R . . 
H30E H 1.0564 -0.3044 0.0113 0.056 Uiso 1 1 calc R . . 
H30F H 1.0206 -0.3621 0.0466 0.056 Uiso 1 1 calc R . . 
C1S C 0.8538(4) 0.5512(3) 0.14374(11) 0.0325(9) Uani 1 1 d . . . 
C2S C 0.9005(5) 0.4518(3) 0.15382(13) 0.0406(11) Uani 1 1 d . . . 
H2S1 H 0.8845 0.4025 0.1352 0.061 Uiso 1 1 calc R . . 
H2S2 H 0.8649 0.4293 0.1758 0.061 Uiso 1 1 calc R . . 
H2S3 H 0.9833 0.4574 0.1572 0.061 Uiso 1 1 calc R . . 
C3S C 0.9124(5) 0.6060(5) 0.11465(16) 0.0550(14) Uani 1 1 d . . . 
H3S1 H 0.8747 0.6712 0.1107 0.082 Uiso 1 1 calc R . . 
H3S2 H 0.9086 0.5654 0.0931 0.082 Uiso 1 1 calc R . . 
H3S3 H 0.9925 0.6174 0.1210 0.082 Uiso 1 1 calc R . . 
 
loop_ 
 _atom_site_aniso_label 
 _atom_site_aniso_U_11 
 _atom_site_aniso_U_22 
 _atom_site_aniso_U_33 
 _atom_site_aniso_U_23 
 _atom_site_aniso_U_13 
 _atom_site_aniso_U_12 
O14 0.0204(14) 0.0384(16) 0.0264(14) -0.0009(12) -0.0023(12) -0.0021(12) 
O7 0.0288(15) 0.0203(12) 0.0277(13) 0.0006(11) 0.0029(13) -0.0030(11) 
O2 0.0292(15) 0.0224(13) 0.0270(13) 0.0005(11) 0.0043(12) -0.0010(11) 
O15 0.0299(15) 0.0303(14) 0.0299(14) 0.0088(12) -0.0063(13) -0.0041(12) 
O12 0.0273(14) 0.0254(13) 0.0292(14) 0.0001(11) 0.0066(12) -0.0007(12) 
O7' 0.0305(15) 0.0228(13) 0.0266(13) 0.0064(11) 0.0033(12) 0.0002(12) 
O2' 0.0268(14) 0.0177(12) 0.0284(13) -0.0021(10) 0.0038(12) 0.0003(11) 
O15' 0.0306(15) 0.0268(13) 0.0269(14) 0.0004(11) -0.0051(13) -0.0071(12) 
O12' 0.0213(13) 0.0236(12) 0.0283(13) 0.0000(11) 0.0039(12) 0.0012(11) 
O14' 0.0236(13) 0.0337(15) 0.0194(12) -0.0052(11) -0.0001(11) -0.0013(12) 
O1S 0.0374(19) 0.063(2) 0.0378(17) -0.0111(16) 0.0011(16) 0.0156(17) 
C24 0.036(2) 0.033(2) 0.031(2) -0.0052(17) -0.003(2) 0.0040(19) 
C22 0.034(2) 0.0228(18) 0.0260(19) 0.0012(15) 0.0052(18) -0.0034(17) 
C5 0.0211(18) 0.0253(18) 0.0218(17) -0.0034(15) 0.0033(16) 0.0008(16) 
C4 0.027(2) 0.0192(16) 0.0239(18) -0.0020(14) 0.0045(16) -0.0024(16) 
C3 0.0180(18) 0.0186(16) 0.0232(17) -0.0027(14) 0.0019(15) -0.0008(15) 
C2 0.0202(18) 0.0166(17) 0.033(2) -0.0032(15) 0.0000(17) -0.0018(15) 
C1 0.0197(18) 0.0208(17) 0.0267(18) 0.0016(15) -0.0006(16) 0.0004(15) 
C15 0.0237(19) 0.0247(18) 0.0245(18) 0.0011(15) 0.0003(17) 0.0056(16) 
C16 0.0252(19) 0.0183(16) 0.0180(16) -0.0007(14) -0.0007(15) 0.0030(15) 
C17 0.0232(19) 0.0260(19) 0.0244(18) 0.0022(15) 0.0061(16) -0.0068(16) 
C18 0.028(2) 0.0279(19) 0.0276(19) -0.0074(16) -0.0023(17) 0.0020(17) 
C19 0.025(2) 0.0221(18) 0.035(2) -0.0071(16) 0.0019(18) -0.0031(16) 
C31 0.037(3) 0.031(2) 0.055(3) 0.009(2) 0.002(2) 0.009(2) 
C29 0.024(2) 0.0241(19) 0.040(2) 0.0070(17) 0.0030(18) 0.0000(17) 
C28 0.0213(19) 0.028(2) 0.0291(19) 0.0042(16) 0.0009(16) 0.0037(16) 
C27 0.0238(19) 0.0276(19) 0.0274(19) 0.0032(16) -0.0021(17) 0.0006(17) 
C11 0.026(2) 0.0207(18) 0.0266(19) -0.0017(15) 0.0013(17) 0.0014(16) 
C14 0.0191(18) 0.0188(17) 0.032(2) 0.0050(15) 0.0001(17) -0.0043(15) 
C8 0.0204(18) 0.0175(16) 0.0261(18) -0.0007(14) 0.0006(16) 0.0015(15) 
C7 0.0230(19) 0.0193(17) 0.0260(18) 0.0010(15) 0.0046(16) -0.0014(15) 
C6 0.0211(19) 0.0207(17) 0.0247(18) 0.0021(15) 0.0019(16) 0.0002(16) 
C26 0.039(2) 0.0267(19) 0.0226(18) 0.0018(16) -0.0057(18) 0.0006(18) 
C23 0.033(2) 0.040(2) 0.027(2) -0.0033(18) -0.0028(19) 0.002(2) 
C25 0.028(2) 0.029(2) 0.0269(19) -0.0030(16) 0.0043(18) -0.0090(17) 
C9 0.0158(18) 0.0200(17) 0.0276(18) -0.0011(15) 0.0034(15) -0.0030(14) 
C10 0.0238(19) 0.0182(17) 0.0241(17) -0.0003(14) 0.0035(16) 0.0024(15) 
C13 0.0226(19) 0.0243(18) 0.0255(18) -0.0011(15) -0.0041(16) -0.0021(16) 
C21 0.026(2) 0.0229(18) 0.032(2) -0.0006(16) -0.0028(18) 0.0086(16) 
C20 0.025(2) 0.0212(18) 0.034(2) 0.0026(15) 0.0063(18) -0.0040(16) 
C12 0.0218(18) 0.0239(18) 0.0177(17) -0.0035(14) -0.0001(15) -0.0056(16) 
C32 0.024(2) 0.0276(19) 0.0299(19) 0.0073(16) 0.0000(17) 0.0015(17) 
C33 0.027(2) 0.0241(18) 0.029(2) 0.0025(16) -0.0022(18) -0.0063(17) 
C30 0.030(2) 0.028(2) 0.050(3) -0.0021(19) 0.007(2) 0.0035(18) 
C24' 0.020(2) 0.040(2) 0.051(3) 0.003(2) -0.001(2) 0.0047(18) 
C22' 0.026(2) 0.028(2) 0.031(2) 0.0064(17) 0.0019(18) -0.0020(17) 
C5' 0.0209(18) 0.0210(18) 0.0256(18) -0.0020(15) 0.0036(16) 0.0024(15) 
C4' 0.0231(19) 0.0178(17) 0.0253(18) 0.0030(14) 0.0025(16) 0.0017(15) 
C3' 0.0212(19) 0.0158(16) 0.0193(16) 0.0028(14) -0.0027(15) 0.0005(14) 
C2' 0.030(2) 0.0186(17) 0.0137(15) 0.0021(13) 0.0013(16) 0.0016(16) 
C1' 0.026(2) 0.0165(16) 0.0221(18) 0.0010(14) -0.0013(16) -0.0043(15) 
C15' 0.0215(19) 0.0202(17) 0.0237(18) -0.0058(15) 0.0041(16) 0.0009(15) 
C16' 0.0224(19) 0.0162(16) 0.0271(18) -0.0037(14) 0.0002(16) 0.0029(14) 
C21' 0.026(2) 0.0221(18) 0.032(2) -0.0026(16) 0.0004(18) 0.0029(16) 
C20' 0.031(2) 0.0242(19) 0.034(2) -0.0012(17) 0.0034(19) -0.0066(17) 
C19' 0.046(3) 0.0259(19) 0.0200(18) 0.0019(15) 0.0039(19) 0.0035(19) 
C31' 0.049(3) 0.041(3) 0.059(3) -0.031(2) -0.002(3) 0.014(2) 
C29' 0.034(2) 0.0217(18) 0.0275(19) 0.0019(15) 0.0038(18) -0.0035(17) 
C28' 0.030(2) 0.0231(18) 0.0264(19) -0.0023(15) 0.0026(18) 0.0010(17) 
C27' 0.029(2) 0.0224(18) 0.030(2) -0.0021(16) -0.0025(18) -0.0042(16) 
C11' 0.0233(19) 0.0171(16) 0.0241(18) -0.0005(14) -0.0019(16) -0.0028(15) 
C10' 0.0209(18) 0.0142(16) 0.034(2) 0.0037(15) -0.0008(17) -0.0049(15) 
C9' 0.029(2) 0.0214(18) 0.0145(16) 0.0076(14) -0.0034(15) 0.0005(15) 
C8' 0.0220(19) 0.0174(17) 0.0231(17) 0.0018(14) -0.0010(16) 0.0035(15) 
C7' 0.027(2) 0.0163(17) 0.0240(17) 0.0019(14) 0.0008(16) 0.0031(15) 
C6' 0.032(2) 0.0179(17) 0.0277(19) 0.0012(15) 0.0064(17) -0.0013(16) 
C25' 0.027(2) 0.031(2) 0.028(2) 0.0040(17) 0.0014(17) 0.0036(17) 
C23' 0.025(2) 0.037(2) 0.050(3) 0.004(2) 0.000(2) -0.0026(19) 
C13' 0.031(2) 0.0200(17) 0.0199(17) 0.0031(14) -0.0064(16) -0.0042(16) 
C32' 0.033(2) 0.0289(19) 0.0217(18) 0.0012(16) -0.0027(18) -0.0101(17) 
C33' 0.029(2) 0.0232(18) 0.033(2) 0.0058(16) -0.0068(19) -0.0017(17) 
C17' 0.0230(19) 0.0207(17) 0.030(2) -0.0032(15) 0.0008(17) 0.0004(15) 
C18' 0.031(2) 0.0267(19) 0.0249(18) -0.0012(16) 0.0083(18) 0.0024(17) 
C12' 0.0202(18) 0.0217(18) 0.0182(16) 0.0050(14) -0.0036(15) 0.0033(15) 
C14' 0.026(2) 0.0154(16) 0.0218(17) 0.0030(14) 0.0014(16) -0.0030(15) 
C26' 0.025(2) 0.028(2) 0.037(2) 0.0032(18) 0.0029(19) -0.0061(18) 
C30' 0.038(3) 0.032(2) 0.041(2) -0.0013(19) 0.006(2) 0.0066(19) 
C1S 0.030(2) 0.036(2) 0.031(2) -0.0105(18) -0.0086(19) 0.0017(19) 
C2S 0.047(3) 0.034(2) 0.041(2) -0.0051(19) 0.004(2) -0.002(2) 
C3S 0.051(3) 0.059(3) 0.056(3) 0.015(3) 0.012(3) 0.000(3) 
 
_geom_special_details 
; 
 All esds (except the esd in the dihedral angle between two l.s. planes) 
 are estimated using the full covariance matrix.  The cell esds are taken 
 into account individually in the estimation of esds in distances, angles 
 and torsion angles; correlations between esds in cell parameters are only 
 used when they are defined by crystal symmetry.  An approximate (isotropic) 
 treatment of cell esds is used for estimating esds involving l.s. planes. 
; 
 
loop_ 
 _geom_bond_atom_site_label_1 
 _geom_bond_atom_site_label_2 
 _geom_bond_distance 
 _geom_bond_site_symmetry_2 
 _geom_bond_publ_flag 
O14 C14 1.217(5) . ? 
O7 C7 1.415(5) . ? 
O7 H7 0.8400 . ? 
O2 C2 1.201(5) . ? 
O15 C15 1.231(5) . ? 
O12 C12 1.232(5) . ? 
O7' C7' 1.418(4) . ? 
O7' H7' 0.8400 . ? 
O2' C2' 1.210(4) . ? 
O15' C15' 1.232(5) . ? 
O12' C12' 1.221(5) . ? 
O14' C14' 1.225(5) . ? 
O1S C1S 1.223(6) . ? 
C24 C22 1.485(6) . ? 
C24 H24A 0.9800 . ? 
C24 H24B 0.9800 . ? 
C24 H24C 0.9800 . ? 
C22 C23 1.346(7) . ? 
C22 C5 1.521(5) . ? 
C5 C4 1.536(5) . ? 
C5 C6 1.575(5) . ? 
C5 H5 1.0000 . ? 
C4 C3 1.530(5) . ? 
C4 H4A 0.9900 . ? 
C4 H4B 0.9900 . ? 
C3 C2 1.521(5) . ? 
C3 C14 1.536(5) . ? 
C3 C8 1.566(5) . ? 
C2 C1 1.538(5) . ? 
C1 C12 1.526(5) . ? 
C1 C15 1.543(5) . ? 
C1 C13 1.610(5) . ? 
C15 C16 1.490(6) . ? 
C16 C21 1.382(6) . ? 
C16 C17 1.401(5) . ? 
C17 C18 1.382(6) . ? 
C17 H17 0.9500 . ? 
C18 C19 1.378(6) . ? 
C18 H18 0.9500 . ? 
C19 C20 1.386(6) . ? 
C19 H19 0.9500 . ? 
C31 C29 1.494(6) . ? 
C31 H31A 0.9800 . ? 
C31 H31B 0.9800 . ? 
C31 H31C 0.9800 . ? 
C29 C28 1.333(6) . ? 
C29 C30 1.495(6) . ? 
C28 C27 1.498(6) . ? 
C28 H28 0.9500 . ? 
C27 C11 1.534(6) . ? 
C27 H27A 0.9900 . ? 
C27 H27B 0.9900 . ? 
C11 C12 1.515(5) . ? 
C11 C14 1.522(5) . ? 
C11 C10 1.551(5) . ? 
C8 C9 1.532(5) . ? 
C8 C7 1.556(5) . ? 
C8 H8 1.0000 . ? 
C7 C6 1.551(5) . ? 
C7 H7A 1.0000 . ? 
C6 C25 1.526(6) . ? 
C6 C26 1.537(5) . ? 
C26 H26A 0.9800 . ? 
C26 H26B 0.9800 . ? 
C26 H26C 0.9800 . ? 
C23 H23A 0.9500 . ? 
C23 H23B 0.9500 . ? 
C25 H25A 0.9800 . ? 
C25 H25B 0.9800 . ? 
C25 H25C 0.9800 . ? 
C9 C10 1.530(5) . ? 
C9 C13 1.567(5) . ? 
C9 H9 1.0000 . ? 
C10 H10A 0.9900 . ? 
C10 H10B 0.9900 . ? 
C13 C32 1.530(6) . ? 
C13 C33 1.533(5) . ? 
C21 C20 1.389(6) . ? 
C21 H21 0.9500 . ? 
C20 H20 0.9500 . ? 
C32 H32A 0.9800 . ? 
C32 H32B 0.9800 . ? 
C32 H32C 0.9800 . ? 
C33 H33A 0.9800 . ? 
C33 H33B 0.9800 . ? 
C33 H33C 0.9800 . ? 
C30 H30A 0.9800 . ? 
C30 H30B 0.9800 . ? 
C30 H30C 0.9800 . ? 
C24' C22' 1.487(6) . ? 
C24' H24D 0.9800 . ? 
C24' H24E 0.9800 . ? 
C24' H24F 0.9800 . ? 
C22' C23' 1.364(6) . ? 
C22' C5' 1.517(6) . ? 
C5' C4' 1.543(5) . ? 
C5' C6' 1.565(5) . ? 
C5' H5' 1.0000 . ? 
C4' C3' 1.518(5) . ? 
C4' H4'1 0.9900 . ? 
C4' H4'2 0.9900 . ? 
C3' C2' 1.532(5) . ? 
C3' C14' 1.541(5) . ? 
C3' C8' 1.563(5) . ? 
C2' C1' 1.525(6) . ? 
C1' C12' 1.524(5) . ? 
C1' C15' 1.536(5) . ? 
C1' C13' 1.603(5) . ? 
C15' C16' 1.491(5) . ? 
C16' C21' 1.381(6) . ? 
C16' C17' 1.416(6) . ? 
C21' C20' 1.388(6) . ? 
C21' H21' 0.9500 . ? 
C20' C19' 1.386(6) . ? 
C20' H20' 0.9500 . ? 
C19' C18' 1.384(6) . ? 
C19' H19' 0.9500 . ? 
C31' C29' 1.484(7) . ? 
C31' H31D 0.9800 . ? 
C31' H31E 0.9800 . ? 
C31' H31F 0.9800 . ? 
C29' C28' 1.332(6) . ? 
C29' C30' 1.497(6) . ? 
C28' C27' 1.500(6) . ? 
C28' H28' 0.9500 . ? 
C27' C11' 1.523(5) . ? 
C27' H27C 0.9900 . ? 
C27' H27D 0.9900 . ? 
C11' C12' 1.517(5) . ? 
C11' C14' 1.535(5) . ? 
C11' C10' 1.560(5) . ? 
C10' C9' 1.518(5) . ? 
C10' H10C 0.9900 . ? 
C10' H10D 0.9900 . ? 
C9' C8' 1.529(5) . ? 
C9' C13' 1.563(5) . ? 
C9' H9' 1.0000 . ? 
C8' C7' 1.535(5) . ? 
C8' H8' 1.0000 . ? 
C7' C6' 1.547(6) . ? 
C7' H7'1 1.0000 . ? 
C6' C25' 1.533(5) . ? 
C6' C26' 1.535(5) . ? 
C25' H25D 0.9800 . ? 
C25' H25E 0.9800 . ? 
C25' H25F 0.9800 . ? 
C23' H23C 0.9500 . ? 
C23' H23D 0.9500 . ? 
C13' C33' 1.531(6) . ? 
C13' C32' 1.535(5) . ? 
C32' H32D 0.9800 . ? 
C32' H32E 0.9800 . ? 
C32' H32F 0.9800 . ? 
C33' H33D 0.9800 . ? 
C33' H33E 0.9800 . ? 
C33' H33F 0.9800 . ? 
C17' C18' 1.369(6) . ? 
C17' H17' 0.9500 . ? 
C18' H18' 0.9500 . ? 
C26' H26D 0.9800 . ? 
C26' H26E 0.9800 . ? 
C26' H26F 0.9800 . ? 
C30' H30D 0.9800 . ? 
C30' H30E 0.9800 . ? 
C30' H30F 0.9800 . ? 
C1S C2S 1.474(6) . ? 
C1S C3S 1.490(7) . ? 
C2S H2S1 0.9800 . ? 
C2S H2S2 0.9800 . ? 
C2S H2S3 0.9800 . ? 
C3S H3S1 0.9800 . ? 
C3S H3S2 0.9800 . ? 
C3S H3S3 0.9800 . ? 
 
loop_ 
 _geom_angle_atom_site_label_1 
 _geom_angle_atom_site_label_2 
 _geom_angle_atom_site_label_3 
 _geom_angle 
 _geom_angle_site_symmetry_1 
 _geom_angle_site_symmetry_3 
 _geom_angle_publ_flag 
C7 O7 H7 109.5 . . ? 
C7' O7' H7' 109.5 . . ? 
C22 C24 H24A 109.5 . . ? 
C22 C24 H24B 109.5 . . ? 
H24A C24 H24B 109.5 . . ? 
C22 C24 H24C 109.5 . . ? 
H24A C24 H24C 109.5 . . ? 
H24B C24 H24C 109.5 . . ? 
C23 C22 C24 121.4(4) . . ? 
C23 C22 C5 117.3(4) . . ? 
C24 C22 C5 121.1(4) . . ? 
C22 C5 C4 108.7(3) . . ? 
C22 C5 C6 118.0(3) . . ? 
C4 C5 C6 112.3(3) . . ? 
C22 C5 H5 105.6 . . ? 
C4 C5 H5 105.6 . . ? 
C6 C5 H5 105.6 . . ? 
C3 C4 C5 111.6(3) . . ? 
C3 C4 H4A 109.3 . . ? 
C5 C4 H4A 109.3 . . ? 
C3 C4 H4B 109.3 . . ? 
C5 C4 H4B 109.3 . . ? 
H4A C4 H4B 108.0 . . ? 
C2 C3 C4 111.8(3) . . ? 
C2 C3 C14 106.7(3) . . ? 
C4 C3 C14 112.4(3) . . ? 
C2 C3 C8 104.6(3) . . ? 
C4 C3 C8 111.4(3) . . ? 
C14 C3 C8 109.6(3) . . ? 
O2 C2 C3 123.2(4) . . ? 
O2 C2 C1 121.9(4) . . ? 
C3 C2 C1 114.6(3) . . ? 
C12 C1 C2 112.7(3) . . ? 
C12 C1 C15 109.0(3) . . ? 
C2 C1 C15 108.3(3) . . ? 
C12 C1 C13 105.4(3) . . ? 
C2 C1 C13 103.7(3) . . ? 
C15 C1 C13 117.8(3) . . ? 
O15 C15 C16 121.0(3) . . ? 
O15 C15 C1 120.8(4) . . ? 
C16 C15 C1 118.1(3) . . ? 
C21 C16 C17 118.9(4) . . ? 
C21 C16 C15 117.1(3) . . ? 
C17 C16 C15 124.0(3) . . ? 
C18 C17 C16 120.7(4) . . ? 
C18 C17 H17 119.7 . . ? 
C16 C17 H17 119.7 . . ? 
C19 C18 C17 120.1(4) . . ? 
C19 C18 H18 120.0 . . ? 
C17 C18 H18 120.0 . . ? 
C18 C19 C20 119.5(4) . . ? 
C18 C19 H19 120.2 . . ? 
C20 C19 H19 120.2 . . ? 
C29 C31 H31A 109.5 . . ? 
C29 C31 H31B 109.5 . . ? 
H31A C31 H31B 109.5 . . ? 
C29 C31 H31C 109.5 . . ? 
H31A C31 H31C 109.5 . . ? 
H31B C31 H31C 109.5 . . ? 
C28 C29 C31 124.8(4) . . ? 
C28 C29 C30 120.7(4) . . ? 
C31 C29 C30 114.5(4) . . ? 
C29 C28 C27 125.9(4) . . ? 
C29 C28 H28 117.0 . . ? 
C27 C28 H28 117.0 . . ? 
C28 C27 C11 113.9(3) . . ? 
C28 C27 H27A 108.8 . . ? 
C11 C27 H27A 108.8 . . ? 
C28 C27 H27B 108.8 . . ? 
C11 C27 H27B 108.8 . . ? 
H27A C27 H27B 107.7 . . ? 
C12 C11 C14 104.9(3) . . ? 
C12 C11 C27 112.8(3) . . ? 
C14 C11 C27 111.1(3) . . ? 
C12 C11 C10 104.8(3) . . ? 
C14 C11 C10 109.4(3) . . ? 
C27 C11 C10 113.3(3) . . ? 
O14 C14 C11 121.8(4) . . ? 
O14 C14 C3 122.1(4) . . ? 
C11 C14 C3 116.0(3) . . ? 
C9 C8 C7 114.6(3) . . ? 
C9 C8 C3 109.1(3) . . ? 
C7 C8 C3 108.3(3) . . ? 
C9 C8 H8 108.2 . . ? 
C7 C8 H8 108.2 . . ? 
C3 C8 H8 108.2 . . ? 
O7 C7 C6 112.7(3) . . ? 
O7 C7 C8 110.9(3) . . ? 
C6 C7 C8 112.4(3) . . ? 
O7 C7 H7A 106.8 . . ? 
C6 C7 H7A 106.8 . . ? 
C8 C7 H7A 106.8 . . ? 
C25 C6 C26 108.6(3) . . ? 
C25 C6 C7 111.6(3) . . ? 
C26 C6 C7 108.5(3) . . ? 
C25 C6 C5 115.1(3) . . ? 
C26 C6 C5 107.4(3) . . ? 
C7 C6 C5 105.4(3) . . ? 
C6 C26 H26A 109.5 . . ? 
C6 C26 H26B 109.5 . . ? 
H26A C26 H26B 109.5 . . ? 
C6 C26 H26C 109.5 . . ? 
H26A C26 H26C 109.5 . . ? 
H26B C26 H26C 109.5 . . ? 
C22 C23 H23A 120.0 . . ? 
C22 C23 H23B 120.0 . . ? 
H23A C23 H23B 120.0 . . ? 
C6 C25 H25A 109.5 . . ? 
C6 C25 H25B 109.5 . . ? 
H25A C25 H25B 109.5 . . ? 
C6 C25 H25C 109.5 . . ? 
H25A C25 H25C 109.5 . . ? 
H25B C25 H25C 109.5 . . ? 
C10 C9 C8 109.5(3) . . ? 
C10 C9 C13 112.2(3) . . ? 
C8 C9 C13 112.0(3) . . ? 
C10 C9 H9 107.6 . . ? 
C8 C9 H9 107.6 . . ? 
C13 C9 H9 107.6 . . ? 
C9 C10 C11 110.5(3) . . ? 
C9 C10 H10A 109.5 . . ? 
C11 C10 H10A 109.5 . . ? 
C9 C10 H10B 109.5 . . ? 
C11 C10 H10B 109.5 . . ? 
H10A C10 H10B 108.1 . . ? 
C32 C13 C33 107.7(3) . . ? 
C32 C13 C9 110.9(3) . . ? 
C33 C13 C9 110.2(3) . . ? 
C32 C13 C1 111.8(3) . . ? 
C33 C13 C1 110.6(3) . . ? 
C9 C13 C1 105.6(3) . . ? 
C16 C21 C20 120.1(4) . . ? 
C16 C21 H21 120.0 . . ? 
C20 C21 H21 120.0 . . ? 
C19 C20 C21 120.7(4) . . ? 
C19 C20 H20 119.7 . . ? 
C21 C20 H20 119.7 . . ? 
O12 C12 C11 122.5(3) . . ? 
O12 C12 C1 120.9(3) . . ? 
C11 C12 C1 116.3(3) . . ? 
C13 C32 H32A 109.5 . . ? 
C13 C32 H32B 109.5 . . ? 
H32A C32 H32B 109.5 . . ? 
C13 C32 H32C 109.5 . . ? 
H32A C32 H32C 109.5 . . ? 
H32B C32 H32C 109.5 . . ? 
C13 C33 H33A 109.5 . . ? 
C13 C33 H33B 109.5 . . ? 
H33A C33 H33B 109.5 . . ? 
C13 C33 H33C 109.5 . . ? 
H33A C33 H33C 109.5 . . ? 
H33B C33 H33C 109.5 . . ? 
C29 C30 H30A 109.5 . . ? 
C29 C30 H30B 109.5 . . ? 
H30A C30 H30B 109.5 . . ? 
C29 C30 H30C 109.5 . . ? 
H30A C30 H30C 109.5 . . ? 
H30B C30 H30C 109.5 . . ? 
C22' C24' H24D 109.5 . . ? 
C22' C24' H24E 109.5 . . ? 
H24D C24' H24E 109.5 . . ? 
C22' C24' H24F 109.5 . . ? 
H24D C24' H24F 109.5 . . ? 
H24E C24' H24F 109.5 . . ? 
C23' C22' C24' 120.1(4) . . ? 
C23' C22' C5' 119.4(4) . . ? 
C24' C22' C5' 120.4(4) . . ? 
C22' C5' C4' 110.9(3) . . ? 
C22' C5' C6' 115.0(3) . . ? 
C4' C5' C6' 111.7(3) . . ? 
C22' C5' H5' 106.2 . . ? 
C4' C5' H5' 106.2 . . ? 
C6' C5' H5' 106.2 . . ? 
C3' C4' C5' 113.1(3) . . ? 
C3' C4' H4'1 109.0 . . ? 
C5' C4' H4'1 109.0 . . ? 
C3' C4' H4'2 109.0 . . ? 
C5' C4' H4'2 109.0 . . ? 
H4'1 C4' H4'2 107.8 . . ? 
C4' C3' C2' 112.1(3) . . ? 
C4' C3' C14' 113.8(3) . . ? 
C2' C3' C14' 107.1(3) . . ? 
C4' C3' C8' 110.6(3) . . ? 
C2' C3' C8' 104.1(3) . . ? 
C14' C3' C8' 108.7(3) . . ? 
O2' C2' C1' 121.9(3) . . ? 
O2' C2' C3' 122.5(4) . . ? 
C1' C2' C3' 115.2(3) . . ? 
C12' C1' C2' 110.7(3) . . ? 
C12' C1' C15' 108.3(3) . . ? 
C2' C1' C15' 110.3(3) . . ? 
C12' C1' C13' 106.6(3) . . ? 
C2' C1' C13' 104.4(3) . . ? 
C15' C1' C13' 116.4(3) . . ? 
O15' C15' C16' 118.9(3) . . ? 
O15' C15' C1' 120.1(3) . . ? 
C16' C15' C1' 120.9(3) . . ? 
C21' C16' C17' 118.1(4) . . ? 
C21' C16' C15' 118.0(4) . . ? 
C17' C16' C15' 123.9(3) . . ? 
C16' C21' C20' 121.3(4) . . ? 
C16' C21' H21' 119.4 . . ? 
C20' C21' H21' 119.4 . . ? 
C19' C20' C21' 119.7(4) . . ? 
C19' C20' H20' 120.1 . . ? 
C21' C20' H20' 120.1 . . ? 
C18' C19' C20' 119.7(4) . . ? 
C18' C19' H19' 120.1 . . ? 
C20' C19' H19' 120.1 . . ? 
C29' C31' H31D 109.5 . . ? 
C29' C31' H31E 109.5 . . ? 
H31D C31' H31E 109.5 . . ? 
C29' C31' H31F 109.5 . . ? 
H31D C31' H31F 109.5 . . ? 
H31E C31' H31F 109.5 . . ? 
C28' C29' C31' 124.1(4) . . ? 
C28' C29' C30' 121.0(4) . . ? 
C31' C29' C30' 114.9(4) . . ? 
C29' C28' C27' 126.1(4) . . ? 
C29' C28' H28' 116.9 . . ? 
C27' C28' H28' 116.9 . . ? 
C28' C27' C11' 114.0(3) . . ? 
C28' C27' H27C 108.7 . . ? 
C11' C27' H27C 108.7 . . ? 
C28' C27' H27D 108.7 . . ? 
C11' C27' H27D 108.7 . . ? 
H27C C27' H27D 107.6 . . ? 
C12' C11' C27' 113.4(3) . . ? 
C12' C11' C14' 103.3(3) . . ? 
C27' C11' C14' 111.9(3) . . ? 
C12' C11' C10' 107.7(3) . . ? 
C27' C11' C10' 112.5(3) . . ? 
C14' C11' C10' 107.4(3) . . ? 
C9' C10' C11' 111.0(3) . . ? 
C9' C10' H10C 109.4 . . ? 
C11' C10' H10C 109.4 . . ? 
C9' C10' H10D 109.4 . . ? 
C11' C10' H10D 109.4 . . ? 
H10C C10' H10D 108.0 . . ? 
C10' C9' C8' 109.4(3) . . ? 
C10' C9' C13' 111.2(3) . . ? 
C8' C9' C13' 112.8(3) . . ? 
C10' C9' H9' 107.8 . . ? 
C8' C9' H9' 107.8 . . ? 
C13' C9' H9' 107.8 . . ? 
C9' C8' C7' 115.1(3) . . ? 
C9' C8' C3' 109.5(3) . . ? 
C7' C8' C3' 109.6(3) . . ? 
C9' C8' H8' 107.4 . . ? 
C7' C8' H8' 107.4 . . ? 
C3' C8' H8' 107.4 . . ? 
O7' C7' C8' 108.9(3) . . ? 
O7' C7' C6' 110.1(3) . . ? 
C8' C7' C6' 114.0(3) . . ? 
O7' C7' H7'1 107.9 . . ? 
C8' C7' H7'1 107.9 . . ? 
C6' C7' H7'1 107.9 . . ? 
C25' C6' C26' 108.2(3) . . ? 
C25' C6' C7' 111.2(3) . . ? 
C26' C6' C7' 107.8(3) . . ? 
C25' C6' C5' 113.4(3) . . ? 
C26' C6' C5' 109.0(3) . . ? 
C7' C6' C5' 107.1(3) . . ? 
C6' C25' H25D 109.5 . . ? 
C6' C25' H25E 109.5 . . ? 
H25D C25' H25E 109.5 . . ? 
C6' C25' H25F 109.5 . . ? 
H25D C25' H25F 109.5 . . ? 
H25E C25' H25F 109.5 . . ? 
C22' C23' H23C 120.0 . . ? 
C22' C23' H23D 120.0 . . ? 
H23C C23' H23D 120.0 . . ? 
C33' C13' C32' 107.7(3) . . ? 
C33' C13' C9' 109.7(3) . . ? 
C32' C13' C9' 110.9(3) . . ? 
C33' C13' C1' 110.2(3) . . ? 
C32' C13' C1' 111.8(3) . . ? 
C9' C13' C1' 106.5(3) . . ? 
C13' C32' H32D 109.5 . . ? 
C13' C32' H32E 109.5 . . ? 
H32D C32' H32E 109.5 . . ? 
C13' C32' H32F 109.5 . . ? 
H32D C32' H32F 109.5 . . ? 
H32E C32' H32F 109.5 . . ? 
C13' C33' H33D 109.5 . . ? 
C13' C33' H33E 109.5 . . ? 
H33D C33' H33E 109.5 . . ? 
C13' C33' H33F 109.5 . . ? 
H33D C33' H33F 109.5 . . ? 
H33E C33' H33F 109.5 . . ? 
C18' C17' C16' 120.5(4) . . ? 
C18' C17' H17' 119.8 . . ? 
C16' C17' H17' 119.8 . . ? 
C17' C18' C19' 120.6(4) . . ? 
C17' C18' H18' 119.7 . . ? 
C19' C18' H18' 119.7 . . ? 
O12' C12' C11' 122.5(3) . . ? 
O12' C12' C1' 120.9(3) . . ? 
C11' C12' C1' 116.5(3) . . ? 
O14' C14' C11' 122.1(3) . . ? 
O14' C14' C3' 121.7(3) . . ? 
C11' C14' C3' 116.2(3) . . ? 
C6' C26' H26D 109.5 . . ? 
C6' C26' H26E 109.5 . . ? 
H26D C26' H26E 109.5 . . ? 
C6' C26' H26F 109.5 . . ? 
H26D C26' H26F 109.5 . . ? 
H26E C26' H26F 109.5 . . ? 
C29' C30' H30D 109.5 . . ? 
C29' C30' H30E 109.5 . . ? 
H30D C30' H30E 109.5 . . ? 
C29' C30' H30F 109.5 . . ? 
H30D C30' H30F 109.5 . . ? 
H30E C30' H30F 109.5 . . ? 
O1S C1S C2S 121.3(5) . . ? 
O1S C1S C3S 121.6(4) . . ? 
C2S C1S C3S 117.0(4) . . ? 
C1S C2S H2S1 109.5 . . ? 
C1S C2S H2S2 109.5 . . ? 
H2S1 C2S H2S2 109.5 . . ? 
C1S C2S H2S3 109.5 . . ? 
H2S1 C2S H2S3 109.5 . . ? 
H2S2 C2S H2S3 109.5 . . ? 
C1S C3S H3S1 109.5 . . ? 
C1S C3S H3S2 109.5 . . ? 
H3S1 C3S H3S2 109.5 . . ? 
C1S C3S H3S3 109.5 . . ? 
H3S1 C3S H3S3 109.5 . . ? 
H3S2 C3S H3S3 109.5 . . ? 
 
loop_ 
 _geom_torsion_atom_site_label_1 
 _geom_torsion_atom_site_label_2 
 _geom_torsion_atom_site_label_3 
 _geom_torsion_atom_site_label_4 
 _geom_torsion 
 _geom_torsion_site_symmetry_1 
 _geom_torsion_site_symmetry_2 
 _geom_torsion_site_symmetry_3 
 _geom_torsion_site_symmetry_4 
 _geom_torsion_publ_flag 
C23 C22 C5 C4 101.2(4) . . . . ? 
C24 C22 C5 C4 -73.4(5) . . . . ? 
C23 C22 C5 C6 -129.4(4) . . . . ? 
C24 C22 C5 C6 56.0(5) . . . . ? 
C22 C5 C4 C3 -170.4(3) . . . . ? 
C6 C5 C4 C3 57.1(4) . . . . ? 
C5 C4 C3 C2 -171.0(3) . . . . ? 
C5 C4 C3 C14 69.0(4) . . . . ? 
C5 C4 C3 C8 -54.4(4) . . . . ? 
C4 C3 C2 O2 12.6(5) . . . . ? 
C14 C3 C2 O2 135.9(4) . . . . ? 
C8 C3 C2 O2 -108.1(4) . . . . ? 
C4 C3 C2 C1 -173.6(3) . . . . ? 
C14 C3 C2 C1 -50.3(4) . . . . ? 
C8 C3 C2 C1 65.8(4) . . . . ? 
O2 C2 C1 C12 -140.3(4) . . . . ? 
C3 C2 C1 C12 45.7(4) . . . . ? 
O2 C2 C1 C15 -19.6(5) . . . . ? 
C3 C2 C1 C15 166.4(3) . . . . ? 
O2 C2 C1 C13 106.2(4) . . . . ? 
C3 C2 C1 C13 -67.7(4) . . . . ? 
C12 C1 C15 O15 -123.8(4) . . . . ? 
C2 C1 C15 O15 113.2(4) . . . . ? 
C13 C1 C15 O15 -3.9(5) . . . . ? 
C12 C1 C15 C16 56.1(4) . . . . ? 
C2 C1 C15 C16 -66.9(4) . . . . ? 
C13 C1 C15 C16 176.0(3) . . . . ? 
O15 C15 C16 C21 15.7(5) . . . . ? 
C1 C15 C16 C21 -164.2(3) . . . . ? 
O15 C15 C16 C17 -163.2(4) . . . . ? 
C1 C15 C16 C17 16.9(5) . . . . ? 
C21 C16 C17 C18 -0.8(6) . . . . ? 
C15 C16 C17 C18 178.0(4) . . . . ? 
C16 C17 C18 C19 -0.1(6) . . . . ? 
C17 C18 C19 C20 2.0(6) . . . . ? 
C31 C29 C28 C27 0.8(7) . . . . ? 
C30 C29 C28 C27 178.0(4) . . . . ? 
C29 C28 C27 C11 143.4(4) . . . . ? 
C28 C27 C11 C12 77.1(4) . . . . ? 
C28 C27 C11 C14 -165.4(3) . . . . ? 
C28 C27 C11 C10 -41.8(5) . . . . ? 
C12 C11 C14 O14 115.9(4) . . . . ? 
C27 C11 C14 O14 -6.3(5) . . . . ? 
C10 C11 C14 O14 -132.1(4) . . . . ? 
C12 C11 C14 C3 -61.1(4) . . . . ? 
C27 C11 C14 C3 176.6(3) . . . . ? 
C10 C11 C14 C3 50.9(4) . . . . ? 
C2 C3 C14 O14 -115.9(4) . . . . ? 
C4 C3 C14 O14 7.0(5) . . . . ? 
C8 C3 C14 O14 131.4(4) . . . . ? 
C2 C3 C14 C11 61.1(4) . . . . ? 
C4 C3 C14 C11 -175.9(3) . . . . ? 
C8 C3 C14 C11 -51.6(4) . . . . ? 
C2 C3 C8 C9 -58.5(4) . . . . ? 
C4 C3 C8 C9 -179.4(3) . . . . ? 
C14 C3 C8 C9 55.6(4) . . . . ? 
C2 C3 C8 C7 176.2(3) . . . . ? 
C4 C3 C8 C7 55.3(4) . . . . ? 
C14 C3 C8 C7 -69.7(4) . . . . ? 
C9 C8 C7 O7 49.6(4) . . . . ? 
C3 C8 C7 O7 171.6(3) . . . . ? 
C9 C8 C7 C6 176.8(3) . . . . ? 
C3 C8 C7 C6 -61.2(4) . . . . ? 
O7 C7 C6 C25 62.2(4) . . . . ? 
C8 C7 C6 C25 -64.0(4) . . . . ? 
O7 C7 C6 C26 -57.4(4) . . . . ? 
C8 C7 C6 C26 176.3(3) . . . . ? 
O7 C7 C6 C5 -172.2(3) . . . . ? 
C8 C7 C6 C5 61.5(4) . . . . ? 
C22 C5 C6 C25 -62.8(4) . . . . ? 
C4 C5 C6 C25 64.9(4) . . . . ? 
C22 C5 C6 C26 58.3(4) . . . . ? 
C4 C5 C6 C26 -174.0(3) . . . . ? 
C22 C5 C6 C7 173.8(3) . . . . ? 
C4 C5 C6 C7 -58.5(4) . . . . ? 
C7 C8 C9 C10 58.7(4) . . . . ? 
C3 C8 C9 C10 -62.9(4) . . . . ? 
C7 C8 C9 C13 -176.1(3) . . . . ? 
C3 C8 C9 C13 62.3(4) . . . . ? 
C8 C9 C10 C11 63.1(4) . . . . ? 
C13 C9 C10 C11 -61.9(4) . . . . ? 
C12 C11 C10 C9 57.0(4) . . . . ? 
C14 C11 C10 C9 -55.1(4) . . . . ? 
C27 C11 C10 C9 -179.6(3) . . . . ? 
C10 C9 C13 C32 -177.7(3) . . . . ? 
C8 C9 C13 C32 58.6(4) . . . . ? 
C10 C9 C13 C33 -58.6(4) . . . . ? 
C8 C9 C13 C33 177.7(3) . . . . ? 
C10 C9 C13 C1 60.9(4) . . . . ? 
C8 C9 C13 C1 -62.7(4) . . . . ? 
C12 C1 C13 C32 -178.9(3) . . . . ? 
C2 C1 C13 C32 -60.3(4) . . . . ? 
C15 C1 C13 C32 59.3(4) . . . . ? 
C12 C1 C13 C33 61.1(4) . . . . ? 
C2 C1 C13 C33 179.7(3) . . . . ? 
C15 C1 C13 C33 -60.7(4) . . . . ? 
C12 C1 C13 C9 -58.1(4) . . . . ? 
C2 C1 C13 C9 60.5(4) . . . . ? 
C15 C1 C13 C9 -179.9(3) . . . . ? 
C17 C16 C21 C20 -0.2(6) . . . . ? 
C15 C16 C21 C20 -179.1(3) . . . . ? 
C18 C19 C20 C21 -3.1(6) . . . . ? 
C16 C21 C20 C19 2.1(6) . . . . ? 
C14 C11 C12 O12 -133.5(4) . . . . ? 
C27 C11 C12 O12 -12.4(5) . . . . ? 
C10 C11 C12 O12 111.3(4) . . . . ? 
C14 C11 C12 C1 52.6(4) . . . . ? 
C27 C11 C12 C1 173.6(3) . . . . ? 
C10 C11 C12 C1 -62.7(4) . . . . ? 
C2 C1 C12 O12 138.3(4) . . . . ? 
C15 C1 C12 O12 18.0(5) . . . . ? 
C13 C1 C12 O12 -109.3(4) . . . . ? 
C2 C1 C12 C11 -47.6(4) . . . . ? 
C15 C1 C12 C11 -167.9(3) . . . . ? 
C13 C1 C12 C11 64.8(4) . . . . ? 
C23' C22' C5' C4' 135.5(4) . . . . ? 
C24' C22' C5' C4' -41.3(5) . . . . ? 
C23' C22' C5' C6' -96.5(5) . . . . ? 
C24' C22' C5' C6' 86.7(5) . . . . ? 
C22' C5' C4' C3' -173.9(3) . . . . ? 
C6' C5' C4' C3' 56.3(4) . . . . ? 
C5' C4' C3' C2' -170.2(3) . . . . ? 
C5' C4' C3' C14' 68.1(4) . . . . ? 
C5' C4' C3' C8' -54.6(4) . . . . ? 
C4' C3' C2' O2' 12.0(5) . . . . ? 
C14' C3' C2' O2' 137.5(3) . . . . ? 
C8' C3' C2' O2' -107.5(4) . . . . ? 
C4' C3' C2' C1' -174.9(3) . . . . ? 
C14' C3' C2' C1' -49.4(4) . . . . ? 
C8' C3' C2' C1' 65.6(4) . . . . ? 
O2' C2' C1' C12' -139.2(3) . . . . ? 
C3' C2' C1' C12' 47.6(4) . . . . ? 
O2' C2' C1' C15' -19.3(5) . . . . ? 
C3' C2' C1' C15' 167.5(3) . . . . ? 
O2' C2' C1' C13' 106.5(4) . . . . ? 
C3' C2' C1' C13' -66.7(4) . . . . ? 
C12' C1' C15' O15' -118.1(4) . . . . ? 
C2' C1' C15' O15' 120.6(4) . . . . ? 
C13' C1' C15' O15' 1.9(5) . . . . ? 
C12' C1' C15' C16' 59.1(4) . . . . ? 
C2' C1' C15' C16' -62.3(4) . . . . ? 
C13' C1' C15' C16' 179.1(3) . . . . ? 
O15' C15' C16' C21' 12.1(5) . . . . ? 
C1' C15' C16' C21' -165.1(3) . . . . ? 
O15' C15' C16' C17' -169.0(4) . . . . ? 
C1' C15' C16' C17' 13.8(5) . . . . ? 
C17' C16' C21' C20' 1.5(6) . . . . ? 
C15' C16' C21' C20' -179.5(4) . . . . ? 
C16' C21' C20' C19' 0.6(6) . . . . ? 
C21' C20' C19' C18' -1.3(6) . . . . ? 
C31' C29' C28' C27' -2.5(7) . . . . ? 
C30' C29' C28' C27' 176.3(4) . . . . ? 
C29' C28' C27' C11' 154.5(4) . . . . ? 
C28' C27' C11' C12' 64.5(4) . . . . ? 
C28' C27' C11' C14' -179.1(3) . . . . ? 
C28' C27' C11' C10' -58.0(4) . . . . ? 
C12' C11' C10' C9' 54.1(4) . . . . ? 
C27' C11' C10' C9' 179.8(3) . . . . ? 
C14' C11' C10' C9' -56.5(4) . . . . ? 
C11' C10' C9' C8' 64.0(4) . . . . ? 
C11' C10' C9' C13' -61.2(4) . . . . ? 
C10' C9' C8' C7' 61.2(4) . . . . ? 
C13' C9' C8' C7' -174.5(3) . . . . ? 
C10' C9' C8' C3' -62.9(4) . . . . ? 
C13' C9' C8' C3' 61.4(4) . . . . ? 
C4' C3' C8' C9' -178.7(3) . . . . ? 
C2' C3' C8' C9' -58.1(4) . . . . ? 
C14' C3' C8' C9' 55.8(4) . . . . ? 
C4' C3' C8' C7' 54.1(4) . . . . ? 
C2' C3' C8' C7' 174.7(3) . . . . ? 
C14' C3' C8' C7' -71.4(4) . . . . ? 
C9' C8' C7' O7' 54.4(4) . . . . ? 
C3' C8' C7' O7' 178.4(3) . . . . ? 
C9' C8' C7' C6' 177.8(3) . . . . ? 
C3' C8' C7' C6' -58.3(4) . . . . ? 
O7' C7' C6' C25' 56.2(4) . . . . ? 
C8' C7' C6' C25' -66.5(4) . . . . ? 
O7' C7' C6' C26' -62.3(4) . . . . ? 
C8' C7' C6' C26' 175.0(3) . . . . ? 
O7' C7' C6' C5' -179.4(3) . . . . ? 
C8' C7' C6' C5' 57.9(4) . . . . ? 
C22' C5' C6' C25' -59.5(5) . . . . ? 
C4' C5' C6' C25' 68.0(4) . . . . ? 
C22' C5' C6' C26' 61.2(4) . . . . ? 
C4' C5' C6' C26' -171.3(3) . . . . ? 
C22' C5' C6' C7' 177.5(3) . . . . ? 
C4' C5' C6' C7' -55.0(4) . . . . ? 
C10' C9' C13' C33' -56.5(4) . . . . ? 
C8' C9' C13' C33' -179.8(3) . . . . ? 
C10' C9' C13' C32' -175.4(3) . . . . ? 
C8' C9' C13' C32' 61.3(4) . . . . ? 
C10' C9' C13' C1' 62.7(4) . . . . ? 
C8' C9' C13' C1' -60.6(4) . . . . ? 
C12' C1' C13' C33' 60.1(4) . . . . ? 
C2' C1' C13' C33' 177.4(3) . . . . ? 
C15' C1' C13' C33' -60.8(4) . . . . ? 
C12' C1' C13' C32' 179.9(3) . . . . ? 
C2' C1' C13' C32' -62.8(4) . . . . ? 
C15' C1' C13' C32' 59.0(5) . . . . ? 
C12' C1' C13' C9' -58.8(4) . . . . ? 
C2' C1' C13' C9' 58.5(4) . . . . ? 
C15' C1' C13' C9' -179.7(3) . . . . ? 
C21' C16' C17' C18' -2.9(6) . . . . ? 
C15' C16' C17' C18' 178.2(4) . . . . ? 
C16' C17' C18' C19' 2.3(6) . . . . ? 
C20' C19' C18' C17' -0.1(6) . . . . ? 
C27' C11' C12' O12' -4.8(5) . . . . ? 
C14' C11' C12' O12' -126.1(4) . . . . ? 
C10' C11' C12' O12' 120.4(4) . . . . ? 
C27' C11' C12' C1' 178.4(3) . . . . ? 
C14' C11' C12' C1' 57.0(4) . . . . ? 
C10' C11' C12' C1' -56.4(4) . . . . ? 
C2' C1' C12' O12' 130.0(4) . . . . ? 
C15' C1' C12' O12' 8.9(5) . . . . ? 
C13' C1' C12' O12' -117.0(4) . . . . ? 
C2' C1' C12' C11' -53.1(4) . . . . ? 
C15' C1' C12' C11' -174.2(3) . . . . ? 
C13' C1' C12' C11' 59.9(4) . . . . ? 
C12' C11' C14' O14' 117.2(4) . . . . ? 
C27' C11' C14' O14' -5.1(5) . . . . ? 
C10' C11' C14' O14' -129.1(4) . . . . ? 
C12' C11' C14' C3' -61.0(4) . . . . ? 
C27' C11' C14' C3' 176.7(3) . . . . ? 
C10' C11' C14' C3' 52.7(4) . . . . ? 
C4' C3' C14' O14' 5.0(5) . . . . ? 
C2' C3' C14' O14' -119.5(4) . . . . ? 
C8' C3' C14' O14' 128.6(4) . . . . ? 
C4' C3' C14' C11' -176.9(3) . . . . ? 
C2' C3' C14' C11' 58.7(4) . . . . ? 
C8' C3' C14' C11' -53.2(4) . . . . ? 
 
loop_ 
 _geom_hbond_atom_site_label_D 
 _geom_hbond_atom_site_label_H 
 _geom_hbond_atom_site_label_A 
 _geom_hbond_distance_DH 
 _geom_hbond_distance_HA 
 _geom_hbond_distance_DA 
 _geom_hbond_angle_DHA 
 _geom_hbond_site_symmetry_A 
O7' H7' O7  0.84 2.00 2.816(4) 162.5 1_545 
O7 H7 O1S  0.84 1.94 2.770(5) 170.9 . 
 
_diffrn_measured_fraction_theta_max    0.925 
_diffrn_reflns_theta_full              72.34 
_diffrn_measured_fraction_theta_full   0.925 
_refine_diff_density_max    0.611 
_refine_diff_density_min   -0.475 
_refine_diff_density_rms    0.100 
